# Supplementary material for: Association of preoperative cognitive frailty with postoperative complications in elderly patients under general anesthesia: a prospective cohort study
Source: Research Square preprint supplement (doi:10.21203/rs.3.rs-4176242/v1), 2024-04-09
Supplement: Supplementary file 1 [file c7baa00b5c3871375dd9c0e6.xlsx]

## Sheet: Original
临床诊断	性别	年龄	婚姻状况	计算后BMI	BMI	受教育程度	退休前职业	吸烟	饮酒	家庭人均月收入	多重用药	应激史.1年内.	术前MOCA学历.1	术前是否为认知障碍	FRAIL总分D0计算后	衰弱分类D0	MOCA术前四分位CF	MOCA术前二分类CF	术后5±2天MOCA	术后5±2学历矫正	术后认知障碍	FRAIL总分D7计算后	衰弱分类D7	二分类术后认知衰弱	四分类术后认知衰弱	aCCI总分计算后1	NRS2002总分_1	SSRS总分计算后	ASA分级_1	手术类型_1	手术部位_1	术前禁食时间.h.	禁止饮水时间.h.	是否使用镇痛泵	超前镇痛_1	麻醉方式	手术时间.min._1	术中输血量_1	术中出血量_1	术中总入量_1	术中尿量_1	术中低血压_1	术后留置管道_1	术后留置管道胃管	术后留置管道留置尿管	术后留置管道腹腔引流管	术后留置管道深静脉导管	术后留置管道伤口引流管	术后留置管道其他
原发性双侧膝关节病（右）	2	78	2	3	28.13	2	2	0	0	3	0	0	26	0	0	0	0	0	23	24	1	3	1	1	1	3	0	33	2	2	2	8	2	0	1	2	100	136.764	20	500	0	0	0	0	0	0	0	0	0
乙状结肠恶性肿瘤	1	71	1	3	26.08	1	2	0	0	3	0	1	23	1	1	0	3	0	24	25	1	3	1	1	1	8	3	36	3	1	1	10	8	1	0	2	119	0	50	1000	429.079	0	1	0	1	1	1	0	0
骨坏死、其他的	2	64	1	2	22.99	3	1	0	0	2	0	1	20	1	4	1	1	1	20	21	1	4	1	1	1	6	0	32	3	2	2	6	2	1	1	2	67	57.5239	100	500	661.337	0	1	0	0	0	0	1	0
升结肠恶性肿瘤	2	61	1	3	24.51	3	2	0	0	3	0	0	26	0	0	0	0	0	24	25	1	2	0	0	3	5	0	34	2	1	1	10	6	1	0	2	160	0	20	1000	582.032	0	1	0	1	0	1	1	0
原发性双侧膝关节病（右）	2	79	1	2	23.62	3	1	0	0	2	0	1	29	0	2	0	0	0	26	27	0	1	0	0	2	4	0	35	3	2	2	12	2	1	1	2	50	0	20	600	172.944	0	1	0	0	0	0	1	0
乙状结肠恶性肿瘤	2	74	1	2	24.44	2	2	0	0	4	0	0	19	1	1	0	3	0	16	17	1	3	1	1	1	5	0	35	2	1	1	10	8	1	0	2	135	38.6549	110.17	1158.64	251.093	0	1	0	1	1	1	1	0
腹膜后肿瘤	1	79	1	2	19.93	1	2	0	0	3	0	1	18	1	3	1	1	1	NA	NA	1	3	1	1	1	5	2	30	3	1	1	8	6	1	0	2	355	400	1000	2500	200	0	1	0	1	1	1	0	0
肝胆管结石伴胆管炎	1	65	1	3	25.1	1	1	1	0	2	0	0	17	1	0	0	3	0	14	15	1	2	0	0	3	2	0	33	2	1	1	8	6	1	0	2	180	0	100	1000	350	0	1	0	1	0	1	1	0
腰椎管狭窄	1	62	1	3	26.42	2	2	1	0	2	0	0	27	0	2	0	0	0	24	25	1	2	0	0	3	2	0	20	2	2	3	8	8	0	1	2	165	NA	150	1000	100	0	1	0	1	0	0	1	0
原发性双侧膝关节病（右）	1	68	1	3	28.26	4	1	0	0	2	0	0	26	0	1	0	0	0	21	21	1	2	0	0	3	3	0	31	2	2	2	8	4	1	1	2	112	0	50	1000	706.988	0	1	0	0	0	0	1	0
乙状结肠恶性肿瘤	2	65	1	2	21.64	2	1	0	0	2	0	1	20	1	0	0	3	0	16	27	0	1	0	0	0	4	0	33	2	1	1	8	6	1	0	2	126	0	5	1000	100	0	1	0	1	1	1	0	0
直肠恶性肿瘤	2	72	1	2	19.72	1	2	0	0	2	0	1	21	1	3	1	1	1	14	23	1	2	0	0	3	5	2	27	3	1	1	8	6	1	0	2	115	0	20	1000	300	0	1	0	1	1	1	1	0
阑尾肿瘤	2	68	1	2	20.42	2	1	0	0	3	0	0	26	0	3	1	2	0	19	25	1	1	0	0	3	4	1	47	2	1	1	12	7	1	0	2	52	0	20	1000	80	0	1	0	1	1	1	0	0
原发性双侧膝关节病（左）	2	74	1	2	23.63	2	2	0	0	2	0	0	14	1	0	0	3	0	12	25	1	2	0	0	3	3	0	43	2	2	2	8	4	1	0	2	45	0	20	500	128.287	0	1	0	0	0	0	1	0
升结肠恶性肿瘤	1	76	1	2	21.02	1	1	0	0	2	0	0	21	1	0	0	3	0	22	22	1	2	0	0	3	6	2	38	3	1	1	10	10	1	0	2	215	0	200	1000	150	0	1	0	1	1	1	0	0
胃肿瘤	2	72	1	2	21.78	1	1	0	0	2	0	1	23	1	1	0	3	0	20	26	0	2	0	0	0	7	0	35	2	1	1	8	6	1	0	2	42	0	10	1000	250	0	1	1	1	0	1	0	0
原发性单侧膝关节病（右）	2	66	1	3	26.95	3	2	0	0	3	0	1	23	1	1	0	3	0	24	25	1	3	1	1	1	2	0	33	2	2	2	8	4	1	1	2	89	48.6689	100	500	353.139	0	1	0	0	0	0	1	0
结肠恶性肿瘤	1	78	2	1	18.2	1	3	0	0	4	0	1	16	1	2	0	3	0	7	8	1	3	1	1	1	5	3	29	2	1	1	10	6	1	0	2	195	0	30	1000	200	0	1	0	1	0	1	1	0
乙状结肠恶性肿瘤	1	69	1	3	19.38	3	2	1	0	3	0	0	29	0	1	0	0	0	27	28	0	4	1	0	2	5	2	40	3	1	1	8	6	1	0	2	185	0	30	1500	150	0	1	0	1	1	1	0	0
原发性单侧膝关节病（左）	2	75	1	3	25.1	1	3	0	0	3	0	0	20	1	1	0	3	0	23	24	1	2	0	0	3	3	0	46	2	2	2	2	10	1	1	2	99	0	30	1000	630.322	0	0	0	0	0	0	0	0
骨坏死、其他的	2	67	1	3	30.39	1	3	0	0	2	0	0	17	1	2	0	3	0	16	17	1	4	0	1	1	3	0	36	2	2	2	10	3	1	1	2	140	0	50	1000	0	0	1	0	0	0	0	1	0
乙状结肠恶性肿瘤	1	61	1	2	23.74	2	3	1	1	4	0	0	23	1	2	0	3	0	20	21	1	3	1	1	1	5	0	43	2	2	1	10	8	1	0	2	135	38.6549	110.17	1158.64	251.093	0	1	0	1	1	1	1	0
胃恶性肿瘤	1	67	1	1	17.92	3	2	0	0	2	0	1	27	0	2	0	0	0	20	21	1	4	1	1	1	4	3	25	2	1	1	12	6	1	0	2	20	0	2	500	30	0	1	0	1	0	1	1	0
股骨颈骨折	1	73	1	2	22.86	4	3	0	0	2	0	0	28	0	2	0	0	0	27	27	0	2	0	0	0	3	0	40	2	2	2	6	2	1	1	2	73	0	100	1000	79.5247	0	0	0	0	0	0	0	0
原发性单侧髋关节病（右）	2	62	1	3	25.33	2	1	0	0	2	0	0	22	1	1	0	3	0	16	17	1	2	0	0	3	2	0	34	2	2	2	12	4	1	1	2	75	271.92	40	1000	0	0	1	0	1	0	0	1	0
骨坏死，其他的	2	73	1	2	18.97	1	1	0	0	2	0	1	24	1	3	1	1	1	18	19	1	4	1	1	1	4	1	38	3	2	2	8	2	1	1	2	84	122.918	100	1000	0	0	1	0	0	0	0	1	0
肝恶性肿瘤	1	63	1	1	18.34	4	2	1	1	2	0	1	22	1	1	0	3	0	23	23	1	3	1	1	1	5	1	33	2	1	1	8	6	1	0	2	126	0	200	1500	350	0	1	0	1	1	1	0	0
直肠恶性肿瘤	2	65	1	2	21.09	2	3	0	0	3	0	0	29	0	0	0	0	0	23	24	1	3	1	1	1	4	0	40	2	1	1	11	11	1	0	2	180	0	20	1000	200	0	1	0	1	1	1	0	0
直肠恶性肿瘤	2	63	1	2	21.37	3	1	0	0	3	0	1	26	0	3	1	2	0	21	22	1	3	1	1	1	5	0	35	3	1	1	11	9	1	0	2	255	0	200	100	200	0	1	0	1	1	1	0	0
颈椎椎管狭窄	1	76	1	1	17.26	2	2	0	0	3	0	0	23	1	2	0	3	0	17	18	1	4	1	1	1	5	1	29	3	2	3	10	10	1	0	2	134	0	50	1000	250	0	1	0	1	0	0	1	0
原发性双侧膝关节病（左）	2	66	1	3	24.65	3	2	0	0	3	0	0	30	0	1	0	0	0	26	27	0	2	0	0	0	2	0	40	2	2	2	12	6	1	1	2	109	0	10	1000	412.351	0	1	0	0	0	0	1	0
原发性双侧膝关节病（左）	2	75	1	3	26.04	3	1	0	0	2	0	0	27	0	1	0	0	0	24	25	1	2	0	0	3	3	0	33	2	2	2	6	2	1	1	2	155	258.978	50	500	188.03	0	1	0	0	0	0	1	0
直肠肿物	1	72	1	2	21.45	3	2	1	1	3	0	0	26	0	0	0	0	0	25	26	0	2	0	0	0	7	0	34	2	1	1	8	6	1	0	2	124	0	30	1000	150	0	1	0	1	1	1	0	0
乙状结肠恶性肿瘤	1	67	1	2	22.66	3	3	1	1	3	0	0	26	0	3	1	2	0	26	27	0	2	0	0	0	7	2	34	3	1	1	10	8	1	0	2	177	0	30	1000	200	0	1	0	0	1	1	0	0
原发性双侧膝关节病（右）	2	82	1	3	30.22	3	3	0	0	2	0	0	26	0	1	0	0	0	18	19	1	2	0	0	3	4	0	39	2	2	2	8	2	1	1	2	115	148.279	50	1000	583.861	0	1	0	0	0	0	1	0
腰椎椎管狭窄	1	69	1	2	21.91	3	3	0	0	2	0	0	26	0	1	0	0	0	23	24	1	3	1	1	1	2	0	35	2	2	3	10	10	1	1	2	265	0	300	2000	400	0	1	0	1	0	1	1	0
原发性双侧膝关节病（左）	2	61	1	3	35.33	4	2	0	0	3	0	0	26	0	1	0	0	0	25	25	1	3	1	1	1	2	0	41	3	2	2	8	4	1	1	2	145	0	100	1000	16.0696	0	0	0	0	0	0	0	0
腰椎椎管狭窄	2	67	1	2	23.23	1	1	0	0	2	0	0	20	1	0	0	3	0	18	19	1	3	1	1	1	3	1	31	2	2	3	10	8	1	1	2	247	0	150	1500	450	0	1	0	0	0	0	1	0
骨坏死，其他的	2	66	1	3	31.64	3	2	0	0	3	0	0	26	0	1	0	0	0	23	24	1	2	0	0	3	3	0	35	2	2	2	8	6	0	1	2	145	61.433	100	500	23.4856	0	0	0	0	0	0	0	0
直肠肿瘤	2	73	1	2	21.48	3	1	0	0	2	0	0	23	1	2	0	3	0	21	22	1	2	0	0	3	7	0	29	3	1	1	8	6	1	0	2	160	0	30	1500	200	0	1	0	1	1	1	1	0
肝恶性肿瘤	1	66	1	2	20.16	1	3	0	0	3	0	1	22	1	0	0	3	0	19	20	1	1	0	0	3	7	1	36	2	1	1	8	6	1	0	2	180	0	50	1100	50	0	1	1	1	1	1	0	0
原发性双侧膝关节病（右）	2	75	1	3	24.97	2	1	0	0	2	0	0	26	0	0	0	0	0	24	25	1	2	0	0	3	3	0	46	2	2	2	8	2	1	1	2	87	122.641	30	1000	0	0	1	0	0	0	0	1	0
腹膜后肿瘤	1	81	1	2	21.77	3	3	0	0	3	1	1	20	1	3	1	1	1	16	17	1	4	1	1	1	8	0	30	3	1	1	8	6	1	0	2	188	0	400	1600	150	0	1	0	1	0	1	1	0
脊柱侧弯	2	66	1	2	20.74	3	1	0	0	3	0	0	16	1	0	0	3	0	14	15	1	2	0	0	3	3	0	34	2	2	3	8	6	1	1	2	130	0	300	1500	250	0	1	0	1	0	1	1	0
乙状结肠恶性肿瘤	1	65	1	3	29.41	2	2	1	0	2	0	0	26	0	0	0	0	0	21	22	1	2	0	0	3	4	0	41	2	1	1	8	6	1	0	2	210	0	20	1500	100	0	1	0	1	1	1	1	0
原发性双侧膝关节病（左）	2	72	1	3	25.56	3	2	0	0	3	1	0	27	0	0	0	0	0	24	25	1	2	0	0	3	3	0	41	2	2	2	12	2	1	1	2	97	54.1122	50	500	0	0	0	0	0	0	0	0	0
原发性双侧膝关节病（左）	2	71	1	3	26.64	1	1	0	0	2	0	0	19	1	1	0	3	0	19	20	1	2	0	0	3	2	0	34	2	2	2	8	4	1	1	2	110	0	20	1000	0	0	1	0	0	0	0	1	0
腰椎椎管狭窄	2	69	1	3	26.91	2	2	0	0	3	0	0	26	0	0	0	0	0	26	27	0	2	0	0	0	2	0	38	2	2	3	10	10	1	1	2	320	0	50	500	650	0	1	0	0	0	0	1	0
升结肠恶性肿瘤	2	73	2	2	20.68	2	3	0	0	3	1	1	27	0	5	1	2	0	22	23	1	5	1	1	1	5	3	22	3	1	1	12	6	1	0	2	126	0	50	1000	100	0	1	0	1	1	1	0	0
回盲部恶性肿瘤	1	60	1	2	19.71	4	3	1	0	4	0	0	26	0	1	0	0	0	25	25	1	4	1	1	1	4	2	45	3	1	1	10	6	1	0	2	175	0	20	2000	100	0	1	0	1	1	1	1	0
直肠肿物	1	79	1	2	18.98	4	3	1	0	3	0	0	27	0	1	0	0	0	22	22	1	2	0	0	3	6	3	35	3	1	1	8	6	1	0	2	157	0	20	1000	0	0	1	0	1	0	1	1	0
腰椎管狭窄	2	69	1	2	23.67	4	2	0	0	2	0	1	29	0	2	0	0	0	26	26	0	3	1	0	2	2	0	31	3	2	3	3	1	1	1	2	36	0	0	137.49	616.937	0	1	0	1	0	0	1	0
腰椎管狭窄	1	67	1	3	24.74	4	2	1	1	2	0	0	26	0	3	1	2	0	NA	NA	1	3	1	1	1	2	0	44	2	2	1	10	7	1	0	2	93	112.848	342.601	970.656	561.587	0	1	0	1	0	0	1	0
胃溃疡癌变	1	67	1	2	22.96	2	2	0	1	2	0	1	26	0	1	0	0	0	26	27	0	3	1	0	2	5	2	41	2	1	1	8	8	1	0	2	170	0	100	1000	300	0	1	0	1	0	1	0	0
乙状结肠恶性肿瘤	1	72	1	3	26.29	2	3	1	0	3	0	0	26	0	2	0	0	0	24	25	1	2	0	0	3	5	0	30	2	1	1	12	12	1	0	2	195	0	20	1500	250	0	1	0	1	0	1	0	0
原发性双侧膝关节病	2	79	1	2	20.72	1	1	0	0	1	0	0	15	1	2	0	3	0	14	15	1	4	1	1	1	4	0	34	3	2	2	10	10	1	1	2	116	55.7115	50	1600	0	0	1	0	0	0	0	1	0
乙状结肠肿瘤	1	73	1	3	27.34	2	3	0	1	3	1	1	21	1	2	0	3	0	21	22	1	3	1	1	1	5	0	39	2	1	1	10	6	1	0	2	175	0	20	1000	100	0	1	0	1	0	1	0	0
腰椎椎管狭窄	2	85	1	2	23.42	4	3	0	0	4	0	0	23	1	4	1	1	1	17	17	1	4	1	1	1	4	0	35	3	2	3	10	10	1	1	2	149	0	50	1000	300	0	1	0	1	0	1	1	0
横结肠恶性肿瘤	2	73	1	2	19.98	3	3	0	0	3	0	1	26	0	2	0	0	0	24	25	1	3	1	1	1	6	3	39	2	1	1	12	12	1	0	2	235	0	50	1500	200	0	1	0	1	0	1	1	0
股骨颈骨折	2	83	2	2	24.03	2	1	0	0	3	0	0	23	1	3	1	1	1	17	18	1	4	1	1	1	4	2	30	2	2	2	8	6	1	1	2	75	0	10	500	0	0	0	0	0	0	0	0	0
胃肿物	2	73	1	2	21.64	1	1	0	0	2	0	0	22	1	3	1	1	1	16	17	1	4	1	1	1	5	3	33	3	1	1	8	6	1	0	2	299	300	800	1500	100	0	1	0	1	1	1	0	0
乙状结肠恶性肿瘤	2	66	1	2	23.23	2	3	0	0	2	0	0	26	0	0	0	0	0	24	25	1	2	0	0	3	4	0	35	2	1	1	12	12	1	0	2	135	0	30	1000	100	0	1	0	1	1	1	0	0
胃恶性肿瘤	1	68	1	3	25.51	3	2	0	0	3	0	1	24	1	1	0	3	0	25	26	0	3	1	0	2	4	2	32	2	1	1	8	6	1	0	2	73	0	5	1000	10	0	1	0	1	0	1	0	0
腰椎间盘突出	1	77	1	3	24.56	1	1	0	1	2	0	1	15	1	3	1	1	1	11	12	1	3	1	1	1	7	0	34	3	2	3	8	6	1	1	2	192	79.3886	50	1000	250	0	1	0	0	0	0	1	0
原发性单侧膝关节病（左）	2	69	1	2	23.73	3	1	0	0	2	0	0	26	0	3	1	2	0	21	22	1	3	1	1	1	3	0	27	2	2	2	4	4	1	1	2	84	0	30	1000	332.832	0	1	0	0	0	0	1	0
原发性双侧膝关节病（右）	2	65	1	3	27.49	3	3	0	0	3	0	0	26	0	3	1	2	0	22	23	1	2	0	0	3	2	0	38	2	2	2	10	3	1	1	2	106	0	50	500	680.804	0	1	0	0	0	0	1	0
升结肠肿瘤	1	69	1	2	24.31	2	3	0	1	3	1	0	27	0	1	0	0	0	25	26	0	2	0	0	0	5	0	44	2	1	1	9	6	1	0	2	180	0	30	1100	50	0	1	0	1	0	1	1	0
腰椎椎管狭窄	2	67	1	3	28.84	2	1	0	0	2	0	0	23	1	0	0	3	0	19	20	1	3	1	1	1	2	0	37	2	2	3	10	10	1	1	2	176	37.1762	30	1000	150	0	1	0	0	0	0	1	0
股骨颈骨折	1	83	1	2	23.37	1	1	0	0	1	0	1	14	1	4	1	1	1	NA	NA	1	4	1	1	1	7	0	31	3	2	2	8	4	1	1	2	40	16.5091	30	1000	0	0	0	0	0	0	0	0	0
胃体恶性肿瘤	1	69	1	2	20.2	2	3	0	0	2	1	1	26	0	0	0	0	0	26	27	0	2	0	0	0	5	1	32	3	1	1	8	8	1	0	2	75	0	30	1000	100	0	1	1	1	0	1	0	0
腰椎椎管狭窄	2	72	1	2	24.06	3	2	0	0	2	0	0	22	1	1	0	3	0	24	25	1	3	1	1	1	3	0	36	2	2	2	8	6	1	1	2	239	0	100	1000	300	0	1	0	1	0	0	1	0
原发性双侧膝关节病（右）	1	70	1	3	28.73	2	1	0	0	3	0	0	26	0	3	1	2	0	22	23	1	3	1	1	1	3	1	30	2	2	2	12	2	1	1	2	91	0	30	500	160.466	0	1	0	0	0	0	1	0
腰椎椎管狭窄	2	64	1	3	25.44	1	1	0	0	2	0	1	27	0	1	0	0	0	25	26	1	2	0	0	3	2	0	36	2	2	3	6	6	1	1	2	181	0	50	1000	400	0	1	0	1	0	0	1	0
直肠肿瘤	2	75	1	2	21.88	2	1	0	0	2	0	1	23	1	2	0	3	0	18	19	1	4	1	1	1	5	3	36	3	1	1	9	6	1	0	2	160	0	20	1000	150	0	1	0	1	1	1	0	0
结肠肿物	1	80	1	2	19.2	1	2	0	0	2	0	1	19	1	3	1	1	1	13	14	1	3	1	1	1	7	3	24	3	1	1	8	6	1	0	2	100	0	20	1000	200	0	1	0	1	1	1	0	0
原发性双侧膝关节病（右）	2	70	1	2	22.06	1	1	0	0	2	0	0	17	1	2	0	3	0	14	15	1	2	0	0	3	3	0	38	2	2	2	4	4	1	1	2	71	0	80	500	247.219	0	1	0	0	0	0	1	0
原发性单侧膝关节病（右）	2	64	1	3	30.22	1	1	0	0	2	0	0	15	1	3	1	1	1	16	17	1	3	1	1	1	3	0	26	2	2	2	4	4	1	1	2	145	139.705	50	500	0	0	1	0	0	0	0	1	0
降结肠肿瘤	1	74	1	3	25.46	1	2	1	0	2	0	1	18	1	4	1	1	1	13	14	1	4	1	1	1	5	3	31	3	1	1	10	6	1	0	2	210	0	20	1500	550	0	1	0	1	1	1	0	0
原发性双侧膝关节病（左）	2	70	1	3	24.61	1	1	0	0	2	0	0	19	1	1	0	3	0	16	17	1	3	1	1	1	3	0	29	2	2	2	8	4	1	1	2	111	0	30	500	0	0	1	0	1	0	0	1	0
肝恶性肿瘤	1	65	1	3	27.77	2	3	0	0	3	1	1	17	1	3	1	1	1	20	21	1	4	1	1	1	12	0	33	3	1	1	8	6	0	0	2	125	0	200	1100	300	0	1	0	1	0	1	1	0
胃恶性肿瘤	1	77	1	1	14.69	4	1	1	0	4	0	1	26	0	1	0	0	0	17	17	1	3	1	1	1	6	4	31	3	1	1	8	6	1	0	2	290	0	200	1500	450	0	1	1	1	0	1	1	0
原发性双侧膝关节病（左）	1	74	1	3	30.85	2	1	0	0	3	0	0	22	1	1	0	3	0	23	24	1	2	0	0	3	3	0	37	2	2	2	8	6	1	1	2	105	0	50	500	311.268	0	1	0	0	0	0	1	0
不完全性肠梗阻	1	85	1	2	21.8	2	3	0	0	4	0	0	15	1	3	1	1	1	10	11	1	3	1	1	1	4	2	42	3	1	1	9	6	1	0	2	115	0	30	1000	200	0	1	0	1	1	1	0	0
直肠肿物	1	71	1	3	25.22	1	2	0	0	4	0	0	18	1	0	0	3	0	15	16	1	2	0	0	3	8	0	29	2	1	1	10	6	0	0	2	214	0	100	500	0	0	1	0	1	0	1	1	0
乙状结肠肿瘤	2	62	2	2	24.17	1	3	0	0	3	0	0	26	0	0	0	0	0	20	21	1	2	0	0	3	4	0	32	2	1	1	8	6	1	0	2	165	0	30	1000	150	0	1	0	1	0	1	1	0
腰椎椎管狭窄	2	65	1	2	23.81	2	1	0	0	2	1	0	17	1	0	0	3	0	16	17	1	2	0	0	3	2	0	34	2	2	3	9	4	1	1	2	227	0	600	2000	350	0	1	0	1	0	1	1	0
原发性双侧膝关节病（右）	2	73	1	3	25.04	1	1	0	0	3	1	1	22	1	3	1	1	1	18	19	1	4	1	1	1	4	1	27	2	2	2	8	2	1	1	2	115	190.942	20	1000	0	0	1	0	0	0	0	1	0
结肠恶性肿瘤	2	75	1	2	23.15	2	3	0	0	3	0	1	25	1	3	1	1	1	22	23	1	3	1	1	1	6	3	42	2	1	1	8	6	1	0	2	315	300	150	2000	600	0	1	0	1	0	1	1	0
神经根型颈椎病	2	69	1	3	25.4	3	3	0	0	3	0	0	26	0	0	0	0	0	25	26	0	2	0	0	0	2	0	31	2	2	3	10	10	1	1	2	156	44.8525	10	1000	291.23	0	1	0	0	0	0	1	0
腰椎椎管狭窄	2	78	1	3	28.76	2	3	0	0	2	0	1	26	0	3	1	2	0	25	26	0	3	1	0	2	3	0	47	2	2	3	2	0	1	1	2	170	43.879	40.4778	2023.76	328.946	0	1	0	0	0	0	1	0
乙状结肠肿瘤	1	65	1	2	22.58	2	3	0	0	3	0	0	26	0	0	0	0	0	20	21	1	3	1	1	1	4	0	44	2	2	1	10	8	1	0	2	135	38.6549	110.17	1158.64	251.093	0	1	0	1	1	1	1	0
类风湿性关节炎（左）	2	72	1	2	22.19	1	1	0	0	2	1	0	13	1	2	0	3	0	6	7	1	4	1	1	1	3	0	26	2	2	2	8	4	1	1	2	106	0	30	1000	119.857	0	0	0	0	0	0	0	0
原发性双侧膝关节病（右）	2	75	1	3	25.63	3	2	0	0	2	0	0	27	0	0	0	0	0	22	23	1	1	0	0	3	3	0	39	2	2	2	8	4	1	1	2	99	0	30	1000	562.764	0	1	0	0	0	0	1	0
原发性单侧膝关节病（左）	1	81	1	2	19.03	1	1	0	0	2	0	0	13	1	3	1	1	1	8	9	1	3	1	1	1	4	0	25	3	2	2	8	2	1	1	2	110	0	30	1000	0	0	1	0	0	0	0	1	0
胃恶性肿瘤	2	68	1	2	21.78	1	2	0	0	3	0	0	26	0	1	0	0	0	20	21	1	2	0	0	3	4	2	35	2	1	1	12	8	1	0	2	170	0	30	1000	500	0	1	0	1	0	1	1	0
胃恶性肿瘤	1	72	2	2	21.01	1	2	0	0	2	0	1	23	1	1	0	3	0	20	21	1	4	1	1	1	8	0	25	3	1	1	9	6	1	0	2	193	0	30	1500	400	0	1	0	1	1	1	0	0
胃肿瘤	2	73	1	2	22.89	4	2	0	0	2	0	0	30	0	0	0	0	0	25	25	1	3	1	1	1	5	0	29	2	1	1	8	6	1	0	2	236	0	300	1500	300	0	1	0	1	1	1	1	0
原发性单侧膝关节病（左）	2	66	1	2	21.51	1	1	0	0	3	0	0	20	1	0	0	3	0	12	13	1	2	0	0	3	2	0	34	2	2	2	6	2	1	1	2	102	108.443	15	1000	0	0	0	0	0	0	0	0	0
股骨颈骨折	2	60	1	2	19.63	2	2	0	0	2	0	1	26	0	3	1	2	0	24	25	1	3	1	1	1	4	1	34	2	2	2	12	12	1	1	2	105	0	20	500	0	0	0	0	0	0	0	0	0
胃恶性肿瘤	1	69	1	2	21.83	3	2	0	0	2	0	1	27	0	1	0	0	0	25	26	0	2	0	0	0	6	0	36	2	1	1	8	6	1	0	2	214	0	50	1000	150	0	1	0	1	0	1	1	0
肠梗阻	2	75	1	3	26.48	2	2	0	0	3	0	0	25	1	4	1	1	1	23	24	1	3	1	1	1	3	1	33	2	1	1	72	72	0	0	2	22	0	2	1000	150	0	1	1	1	0	1	1	0
乙状结肠恶性肿瘤	1	67	1	3	24.77	2	2	0	1	3	0	1	18	1	0	0	3	0	20	21	1	1	0	0	3	4	0	38	2	1	1	8	6	1	0	2	175	0	100	1500	250	0	1	0	1	1	1	0	0
腰椎椎管狭窄	2	66	1	2	24.44	1	2	0	0	2	0	1	15	1	3	1	1	1	16	17	1	3	1	1	1	3	0	27	2	2	3	8	8	0	0	2	124	0	80	1000	150	0	1	0	1	0	0	1	0
原发性双侧膝关节病	2	66	1	3	28.53	1	2	0	0	3	0	1	12	1	2	0	3	0	8	9	1	3	1	1	1	2	0	32	3	2	2	8	6	1	1	2	110	0	80	1000	0	0	1	0	0	0	0	1	0
结肠肿瘤	2	73	1	2	24.44	3	3	0	0	3	0	1	25	1	5	1	1	1	25	26	0	5	1	0	2	8	3	30	3	1	1	12	8	1	0	2	295	0	20	1100	450	0	1	0	1	0	1	1	0
原发性双侧膝关节病（右）	2	72	1	2	24.44	1	1	0	0	2	0	0	15	1	1	0	3	0	12	13	1	3	1	1	1	3	0	36	2	1	2	8	2	1	1	2	34	0	5	500	0	0	0	0	0	0	0	0	0
结肠恶性肿瘤	2	73	1	2	23.73	3	2	0	0	3	0	1	27	0	0	0	0	0	24	25	1	2	0	0	3	6	0	29	3	1	1	8	6	1	0	2	210	0	20	1500	400	0	1	0	1	1	1	0	0
腰椎间盘突出	2	67	1	2	22.31	1	1	0	0	2	0	0	10	1	2	0	3	0	10	11	1	1	0	0	3	3	1	26	2	2	3	6	6	1	1	2	187	0	50	1500	250	0	1	0	0	0	0	1	0
腰椎椎管狭窄	2	73	1	2	23.61	2	2	0	0	2	0	0	23	1	3	1	1	1	20	21	1	4	1	1	1	4	0	40	3	2	3	10	10	1	1	2	240	200	400	1000	350	0	1	0	1	0	0	1	0
骨坏死，其他的	2	74	1	3	25.63	1	1	0	0	3	0	1	17	1	2	0	3	0	13	14	1	3	1	1	1	3	0	30	3	2	2	8	6	1	1	2	90	0	20	1000	292.854	0	1	0	0	0	0	1	0
原发性双侧膝关节病（左）	2	78	1	3	25.78	1	1	0	0	2	0	0	19	1	2	0	3	0	16	17	1	3	1	1	1	3	0	32	3	2	2	10	10	0	1	2	110	0	50	1000	353.622	0	0	0	0	0	0	0	0
胃恶性肿瘤	1	63	1	2	19.76	1	1	1	0	2	0	1	17	1	0	0	3	0	13	14	1	3	1	1	1	4	1	34	2	1	1	14	8	1	0	2	224	0	30	1000	450	0	1	1	1	0	1	1	0
直肠恶性肿瘤	2	60	1	2	20	1	2	0	0	2	0	0	23	1	1	0	3	0	21	22	1	3	1	1	1	5	1	33	2	1	1	12	8	1	0	2	150	0	30	1000	100	0	1	0	1	1	1	1	0
骨坏死，其他的	2	62	2	3	30.83	2	1	0	0	2	0	0	26	0	3	1	2	0	22	23	1	2	0	0	3	2	0	34	2	2	2	12	2	1	1	2	135	0	50	500	93.8686	0	0	0	0	0	0	0	0
原发性单侧膝关节病（右）	2	67	1	3	27.56	2	1	0	0	2	0	1	23	1	0	0	3	0	15	16	1	3	1	1	1	2	0	39	2	2	2	8	4	1	1	2	102	11.2472	50	1000	0	0	0	0	0	0	0	0	0
胃窦恶性肿瘤	1	67	1	2	23.88	4	2	1	0	3	0	0	27	0	3	1	2	0	27	27	0	4	1	0	2	4	2	38	2	1	1	8	6	1	0	2	180	0	400	1500	300	0	1	1	1	0	1	1	0
不完全性瘫痪	2	69	1	3	28.1	1	3	0	0	3	0	0	12	1	4	1	1	1	7	8	1	4	1	1	1	2	0	45	2	2	3	10	10	1	1	2	95	0	50	1000	550	0	1	0	1	0	0	1	0
原发性单侧膝关节病（右）	2	77	1	3	28.91	3	1	0	0	2	0	1	28	0	1	0	0	0	24	25	1	3	1	1	1	0	0	36	2	2	2	10	8	1	0	2	135	38.6549	110.17	1158.64	251.093	0	1	0	1	0	0	1	0
腹部肿瘤	1	62	1	2	21.26	3	2	0	0	3	0	0	27	0	0	0	0	0	27	28	0	3	1	0	2	4	0	34	2	1	1	8	6	1	0	2	320	0	600	2500	250	0	1	0	1	0	1	0	0
骨坏死，其他的	1	69	1	2	20.31	3	2	0	0	3	0	0	22	1	2	0	3	0	22	23	1	4	1	1	1	2	0	30	2	2	2	8	2	1	1	2	100	0	100	1000	220.037	1	1	0	0	0	0	1	0
阑尾肿瘤	2	70	1	3	25.51	1	2	0	0	2	0	0	20	1	2	0	3	0	17	18	1	2	0	0	3	7	0	37	2	1	1	12	12	1	0	2	131	0	30	1000	150	0	1	0	1	0	1	0	0
原发性双侧膝关节病（右）	2	71	1	3	25.97	3	2	0	0	3	0	0	27	0	0	0	0	0	25	26	0	3	1	0	2	3	0	35	2	2	2	12	12	1	1	2	93	0	30	1000	662.447	0	0	0	0	0	0	0	0
腰椎椎管狭窄	2	68	1	3	25.08	1	1	0	0	1	0	0	13	1	2	0	3	0	9	10	1	3	1	1	1	2	0	35	2	2	3	6	6	0	1	2	240	0	150	1500	150	0	1	0	0	0	0	0	0
原发性双侧膝关节病（左）	2	66	1	3	26.64	3	2	0	0	3	0	0	26	0	0	0	0	0	26	27	0	2	0	0	0	2	0	42	2	2	2	8	6	1	1	2	75	0	30	500	777.571	0	1	0	0	0	0	1	0
颈椎椎管狭窄	1	66	1	3	26.95	3	2	0	1	2	0	0	27	0	1	0	0	0	26	27	0	4	1	0	2	2	0	33	2	2	3	0	0	1	1	2	144	0	50	1000	900	0	1	0	1	0	0	1	0
乙状结肠恶性肿瘤	1	62	1	3	25.4	2	2	0	0	2	0	1	29	0	0	0	0	0	27	28	0	2	0	0	0	4	0	35	3	1	1	8	6	1	0	2	130	0	20	1000	100	0	1	0	1	1	1	0	0
人工膝关节	1	73	1	2	20.32	3	2	0	0	3	0	0	27	0	1	0	0	0	25	26	0	2	0	0	0	3	1	29	2	2	2	8	4	1	1	2	120	131.489	100	500	247.826	0	1	0	0	0	0	1	0
腰椎椎管狭窄	2	66	1	2	22.44	1	1	0	0	3	1	0	22	1	1	0	3	0	19	20	1	2	0	0	3	2	0	36	2	2	3	6	6	1	1	2	230	0	100	1000	487.543	0	1	0	0	0	0	1	0
脊椎应力性骨折	1	69	1	2	21.83	4	3	1	0	2	0	0	26	0	3	0	2	0	22	22	1	3	1	1	1	3	0	41	3	2	3	8	6	1	1	2	122	0	30	1000	300	0	1	0	1	0	0	1	0
腰椎管狭窄	1	71	1	2	23.23	4	2	1	1	2	0	1	21	1	2	0	3	0	17	17	1	2	0	0	3	5	1	32	2	2	3	10	10	1	0	2	200	0	20	1000	950	0	1	0	1	0	0	1	0
直肠恶性肿瘤	1	78	2	2	20.76	4	2	0	0	2	0	0	26	0	2	0	0	0	18	18	1	3	1	1	1	5	2	22	2	1	1	8	6	1	0	2	290	0	100	1500	100	0	1	0	1	0	1	1	0
腰椎管狭窄	2	76	2	3	27.14	3	1	0	0	2	0	1	28	0	3	1	2	0	22	23	1	4	1	1	1	8	0	24	3	2	3	8	6	1	1	2	225	NA	100	500	200	0	1	0	1	0	0	1	0
乙状结肠恶性肿瘤	1	76	1	3	24.62	3	1	1	0	2	0	0	26	0	0	0	0	0	24	25	1	2	0	0	3	6	0	33	2	1	1	12	8	1	0	2	140	0	50	1000	100	0	1	0	0	1	1	1	0
原发性双侧膝关节病（左）	1	83	1	3	28.58	1	2	0	0	2	0	0	13	1	3	1	1	1	10	11	1	4	1	1	1	3	0	29	3	2	2	8	2	1	1	2	115	124.56	50	1000	76.3398	0	0	0	0	0	0	0	0
胆总管结石	1	71	1	2	24.13	3	2	0	0	4	0	0	27	0	0	0	0	0	26	27	0	2	0	0	0	3	0	34	2	1	1	8	6	0	0	2	70	0	5	500	0	0	1	0	0	0	0	1	0
直肠恶性肿瘤	2	71	1	2	23.97	2	1	0	0	2	0	1	22	1	2	0	3	0	22	23	1	2	0	0	3	5	2	32	2	1	1	8	6	1	0	2	180	0	20	1500	100	0	1	0	1	1	1	1	0
原发性双侧膝关节病（左）	2	61	1	3	28.34	2	1	0	0	2	0	0	19	1	1	0	3	0	18	19	1	2	0	0	3	3	0	38	2	2	2	8	4	1	1	2	115	0	50	1000	341.268	0	1	0	0	0	0	1	0
股骨颈骨折	2	70	1	2	19.02	2	1	0	0	2	0	0	23	1	2	0	3	0	21	22	1	3	1	1	1	3	1	34	2	2	2	8	8	1	0	2	80	0	20	500	0	0	1	0	0	0	0	1	0
直肠肿物	2	61	1	2	20.63	3	2	0	0	3	0	0	28	0	0	0	0	0	27	28	0	2	0	0	0	5	1	35	3	1	1	8	6	1	0	2	105	0	50	1000	150	0	1	0	1	0	1	1	0
1、腰椎椎管狭窄；2、腰椎滑脱	2	71	1	2	23.81	1	1	0	0	2	0	1	15	1	3	1	1	1	11	12	1	3	1	1	1	3	0	24	2	2	3	10	10	1	1	2	239	0	50	1000	900	0	1	0	0	0	0	1	0
原发性双侧膝关节病（左）	2	64	1	3	25.07	3	1	0	0	3	0	0	26	0	2	0	0	0	22	23	1	3	1	1	1	2	0	38	2	2	2	8	6	1	1	2	95	0	30	1000	45.9233	0	1	0	0	0	0	1	0
原发性双侧膝关节病（左）	2	74	2	1	18.37	3	3	0	0	3	0	1	20	1	2	0	3	0	20	21	1	2	0	0	3	3	0	37	2	2	2	8	4	1	1	2	123	0	20	1000	123.349	0	1	0	0	0	0	1	0
腰椎椎管狭窄	2	61	1	3	26.84	3	2	0	0	3	0	0	26	0	3	1	2	0	22	23	1	3	1	1	1	3	1	39	2	2	3	10	10	1	0	2	178	0	300	1500	300	0	1	0	0	0	0	1	0
乙状结肠恶性肿瘤	2	67	1	2	22.19	4	3	0	0	3	0	0	26	0	1	0	0	0	27	27	0	2	0	0	0	6	2	31	3	1	1	12	8	1	0	2	204	0	50	1500	150	0	1	0	1	1	1	1	0
髋的其他先天性变形（右）	2	62	1	2	22.89	1	1	0	0	2	0	0	19	1	1	0	3	0	15	16	1	3	1	1	1	2	0	28	2	2	2	8	2	1	1	2	66	0	30	1000	114.72	0	1	0	0	0	0	1	0
乙状结肠恶性肿瘤	1	67	1	1	17.92	3	2	1	0	4	0	1	26	0	1	0	0	0	21	22	1	1	0	0	3	4	2	37	2	1	1	8	6	1	0	2	153	0	5	1000	250	0	1	0	1	0	1	1	0
升结肠恶性肿瘤	2	61	2	2	20.13	2	2	0	0	3	0	1	26	0	3	1	2	0	22	23	1	3	1	1	1	6	2	32	2	1	1	8	6	1	0	2	110	0	10	100	100	0	1	0	1	1	1	0	0
原发性单侧膝关节病（左）	2	66	1	3	28.34	1	1	0	0	2	0	1	19	1	2	0	3	0	13	14	1	3	1	1	1	2	0	32	2	2	2	8	4	1	1	2	118	0	80	500	0	0	0	0	0	0	0	0	0
原发性双侧膝关节病（左）	2	72	1	3	27.06	3	3	0	0	3	0	0	29	0	3	1	2	0	27	28	0	2	0	0	0	4	0	39	2	2	2	10	4	1	1	2	105	6	50	1000	723.166	0	1	0	0	0	0	1	0
直肠恶性肿瘤	2	79	1	1	15.11	1	2	0	0	2	0	1	26	0	3	1	2	0	22	23	1	2	0	0	3	6	2	26	2	1	1	9	6	1	0	2	70	0	20	750	50	0	1	0	1	1	1	0	0
直肠恶性肿瘤	2	76	2	2	21.05	1	3	0	0	3	1	1	26	0	3	1	2	0	18	19	1	3	1	1	1	7	0	34	3	1	1	11	6	1	0	2	135	0	20	1000	200	0	1	0	1	1	1	1	0
原发性双侧膝关节病（左）	2	73	2	3	26.81	3	2	0	0	3	0	0	23	1	0	0	3	0	21	22	1	2	0	0	3	3	0	45	2	2	2	8	6	1	1	2	80	14	50	1000	20.2855	0	1	0	0	0	0	1	0
降结肠肿瘤	2	68	1	2	21.63	3	3	0	0	4	0	0	22	1	0	0	3	0	17	18	1	1	0	0	3	4	0	39	2	1	1	8	6	1	0	2	190	0	30	1000	150	0	1	0	1	0	1	1	0
直肠恶性肿瘤	1	62	1	2	22.41	1	1	1	1	3	0	1	20	1	0	0	3	0	16	17	1	2	0	0	3	4	2	33	3	1	1	12	12	1	0	2	177	0	30	2000	200	0	1	0	1	0	1	1	0
腰椎椎管狭窄	1	78	1	3	25.71	2	1	0	0	2	0	1	24	1	3	1	1	1	17	18	1	2	0	0	3	3	0	30	2	2	3	10	8	1	0	2	135	40	110.17	1158.64	251.093	0	1	0	1	0	0	1	0
胃肿瘤	1	70	1	1	15.59	1	2	1	0	3	0	1	23	1	3	1	1	1	23	24	1	3	1	1	1	6	2	32	2	1	1	12	12	1	0	2	38	0	10	500	0	0	1	0	1	0	1	0	0
胃恶性肿瘤	2	71	1	2	21.94	2	1	0	0	3	0	0	23	1	1	0	3	0	21	22	1	2	0	0	3	6	3	43	2	1	1	8	6	1	0	2	150	0	100	1000	100	0	1	0	1	0	1	0	0
原发性双侧膝关节病（左）	2	64	1	3	28.13	2	1	0	0	3	0	0	27	0	1	0	0	0	25	26	0	2	0	0	0	3	0	34	2	2	2	8	2	1	1	2	95	0	50	1000	498.191	0	1	0	0	0	0	1	0
直肠恶性肿瘤	2	67	1	3	27.12	1	2	0	0	3	0	0	21	1	2	0	3	0	16	17	1	3	1	1	1	4	1	38	2	1	1	8	8	1	0	2	350	0	50	2100	300	0	1	0	1	0	1	0	0
腹痛查因	2	72	1	2	18.67	1	1	0	0	1	0	1	15	1	2	0	3	0	10	11	1	3	1	1	1	3	0	24	3	1	1	9	9	1	0	2	122	0	30	1000	100	0	1	0	1	0	1	0	0
不完全性肠梗阻	2	65	2	2	20.81	3	2	0	0	2	0	1	27	0	4	1	2	0	28	29	0	3	1	0	2	4	2	21	2	1	1	24	24	1	0	2	242	0	100	1500	0	0	1	0	1	0	1	1	0
胃肿瘤	1	74	1	2	20.14	3	3	1	1	3	0	1	24	1	3	1	1	1	NA	NA	1	3	1	1	1	6	2	33	2	1	1	12	12	1	0	2	170	0	50	2000	50	0	1	0	1	0	1	0	0
原发性双侧膝关节病（右）	2	81	1	3	31.11	1	1	0	0	3	0	0	17	1	2	0	3	0	15	16	1	3	1	1	1	4	1	27	3	2	2	8	2	1	1	2	85	0	10	1000	0	0	1	0	0	0	0	1	0
直肠肿瘤	2	83	1	2	21.64	1	1	0	0	2	0	0	21	1	1	0	3	0	14	15	1	2	0	0	3	6	0	30	3	1	1	8	6	1	0	2	65	0	10	1000	482.272	0	1	0	1	0	1	0	0
腰椎椎管狭窄	1	65	1	3	26.99	2	1	0	0	3	0	0	23	1	1	0	3	0	20	21	1	2	0	0	3	2	0	30	2	2	3	10	10	1	1	2	155	0	20	1100	250	0	1	0	0	0	0	1	0
结肠肿物	2	85	2	1	16.02	1	1	0	0	2	0	0	21	1	1	0	3	0	16	17	1	2	0	0	3	6	0	22	3	1	1	13	10	1	0	2	190	0	20	1100	200	0	1	0	1	0	1	1	0
胆囊结石伴慢性胆囊炎	2	75	1	2	21.33	3	1	0	0	2	1	0	26	0	1	0	0	0	24	25	1	0	0	0	3	4	0	34	2	1	1	12	6	1	0	2	65	0	2	500	0	0	1	0	0	0	0	1	0
乙状结肠恶性肿瘤	2	65	1	3	25.39	3	1	0	0	2	0	1	20	1	0	0	3	0	15	16	1	2	0	0	3	5	0	34	2	1	1	8	4	1	0	2	180	0	100	1000	100	0	1	0	1	1	1	1	0
腰椎管狭窄	1	60	1	3	32.35	4	1	0	0	2	0	0	30	0	1	0	0	0	26	26	0	2	0	0	0	3	0	41	2	2	3	6	6	1	1	2	188	NA	30	1500	200	0	1	0	1	0	0	1	0
肝恶性肿瘤	2	61	1	2	24.03	1	2	0	0	3	0	0	20	1	1	0	3	0	15	16	1	2	0	0	3	5	0	29	2	1	1	12	12	1	0	2	69	0	30	500	0	0	1	0	0	0	1	1	0
胃肿瘤	2	69	1	3	26.37	1	2	0	0	3	0	1	24	1	2	0	3	0	22	23	1	2	0	0	3	4	0	31	3	1	1	10	6	1	0	2	130	0	20	671.313	360.392	0	1	1	1	1	1	0	0
骨坏死，其他的	1	66	1	2	22.76	2	1	0	1	2	0	0	22	1	0	0	3	0	17	18	1	2	0	0	3	2	0	37	2	2	2	8	2	1	1	2	93	95.5985	30	500	386.6	0	1	0	0	0	0	1	0
直肠恶性肿瘤	1	68	1	2	22.96	3	1	0	0	2	0	1	27	0	1	0	0	0	27	28	0	3	1	0	2	4	2	40	2	1	1	12	12	0	0	2	273	0	50	1500	600	0	1	0	1	1	1	1	0
原发性双侧膝关节病（右）	2	66	1	3	28.04	4	3	0	0	3	0	0	21	1	1	0	3	0	18	18	1	2	0	0	3	2	0	41	2	2	2	8	2	1	1	2	100	0	30	1000	251.944	0	1	0	0	0	0	1	0
人工膝关节	2	66	1	3	25.39	3	1	0	0	2	1	0	29	0	0	0	0	0	24	25	1	2	0	0	3	2	0	30	2	2	2	8	2	1	1	2	95	0	30	600	241.883	0	1	0	1	0	0	1	0
升结肠恶性肿瘤	1	71	1	2	22.04	3	3	0	0	3	1	0	16	1	3	1	1	1	12	13	1	3	1	1	1	8	0	28	3	1	1	10	6	1	0	2	222	0	50	1000	400	0	1	0	1	0	1	1	0
股骨颈骨折（右）	2	77	1	3	24.97	2	2	0	0	3	0	1	21	1	2	0	3	0	17	18	1	3	1	1	1	3	0	34	3	2	2	6	4	1	1	2	95	0	50	1000	1046.51	0	1	0	1	0	1	1	0
原发性单侧膝关节病（左）	2	60	1	2	24.44	2	1	0	0	3	0	0	23	1	1	0	3	0	22	23	1	2	0	0	3	2	0	30	2	2	2	8	2	1	1	2	150	49.56	50	1000	495.899	0	1	0	0	0	0	1	0
腰椎椎管狭窄	1	64	1	3	24.62	3	2	1	0	3	0	0	19	1	1	0	3	0	16	17	1	3	1	1	1	2	0	33	2	2	3	10	10	1	1	2	235	200	600	1500	250	0	1	0	0	0	0	1	0
胃肿瘤	1	74	1	2	19.03	2	1	0	0	3	0	1	27	0	0	0	0	0	26	27	0	3	1	0	2	5	2	33	2	1	1	9	6	1	0	2	205	0	30	1500	900	0	1	1	1	1	1	0	0
原发性双侧膝关节病（左）	2	65	1	2	22.89	2	1	0	0	2	0	0	26	0	1	0	0	0	23	24	1	2	0	0	3	2	0	30	2	2	2	8	6	1	1	2	85	36.5321	20	1000	751.71	0	0	0	0	0	0	0	0
食管胃连接处恶性肿瘤	1	70	1	2	24.16	1	1	0	0	3	0	0	18	1	3	1	1	1	15	16	1	4	1	1	1	5	3	38	2	1	1	8	4	1	0	2	295	0	100	2000	100	0	1	1	1	1	0	0	0
胫骨平台骨折（右）	1	69	1	2	18.98	2	3	0	0	2	0	0	21	1	2	0	3	0	17	18	1	4	1	1	1	4	0	32	3	2	2	6	13	1	1	2	117	0	20	1000	98.9804	0	0	0	0	0	0	0	0
原发性单侧膝关节病（右）	2	64	1	3	26.03	3	2	0	0	3	0	0	22	1	0	0	3	0	17	18	1	2	0	0	3	3	0	35	2	2	2	4	4	1	1	2	92	0	30	500	65.5596	0	1	0	0	0	0	1	0
乙状结肠恶性肿瘤	1	65	1	3	26.56	2	1	0	0	3	0	1	27	0	1	0	0	0	27	28	0	2	0	0	0	4	0	37	2	1	1	8	6	1	0	2	205	0	150	837.058	112.527	0	1	0	1	1	1	0	0
腰椎椎管狭窄	2	61	1	2	22.49	2	1	0	0	3	0	1	26	0	0	0	0	0	23	24	1	2	0	0	3	4	0	39	2	2	3	8	6	1	0	2	187	0	300	1500	500	0	1	0	1	0	0	1	0
直肠恶性肿瘤	1	76	2	3	27.47	1	1	0	0	2	0	1	26	0	0	0	0	0	22	23	1	3	1	1	1	5	0	31	3	1	1	12	8	1	0	2	170	0	50	1500	150	0	1	0	1	1	1	0	0
肠梗阻	1	74	1	2	22.86	1	1	0	0	3	0	0	20	1	4	1	1	1	21	22	1	4	1	1	1	3	3	36	2	1	1	4	4	1	0	2	167	0	50	1000	150	0	1	0	1	1	1	0	0
肝恶性肿瘤	1	62	1	2	19.68	1	1	1	1	3	0	1	18	1	3	1	1	1	19	20	1	5	1	1	1	7	2	33	3	1	1	8	6	1	0	2	260	400	800	1700	450	1	1	0	1	1	1	1	0
升结肠恶性肿瘤	1	78	1	1	17.58	2	3	0	0	4	0	0	10	1	3	1	1	1	8	9	1	3	1	1	1	5	4	34	2	1	1	12	8	1	0	2	150	0	30	1000	150	0	1	0	1	0	1	1	0
回盲部恶性肿瘤	1	70	1	3	25.39	2	2	0	0	2	0	1	21	1	4	1	1	1	19	20	1	5	1	1	1	6	3	34	3	1	1	12	8	1	0	2	218	0	60	1000	150	0	1	0	1	1	1	0	0
原发性双侧膝关节病	1	66	1	3	30.07	2	1	0	0	1	0	1	23	1	1	0	3	0	19	20	1	1	0	0	3	2	1	33	2	1	2	10	10	1	1	2	92	0	50	500	0	0	1	0	0	0	0	1	0
乙状结肠恶性肿瘤	2	85	2	2	23.01	3	2	0	0	3	0	0	16	1	3	1	1	1	20	21	1	3	1	1	1	7	0	27	2	1	1	9	9	1	0	2	200	0	20	500	180	0	1	0	1	1	1	0	0
直肠恶性肿瘤	1	60	1	2	23.67	3	2	1	0	2	0	1	23	1	2	0	3	0	20	21	1	2	0	0	3	4	0	33	2	1	1	10	6	1	0	2	202	0	30	1500	100	0	1	0	1	1	1	0	0
腰椎椎管狭窄	2	68	2	2	22.83	3	1	0	0	1	0	1	27	0	3	1	2	0	25	26	0	3	1	0	2	2	0	32	3	2	3	6	6	1	1	2	355	200	300	1500	150	0	1	0	1	0	1	1	0
腰椎椎管狭窄	1	72	1	3	26.47	2	2	0	0	2	0	0	23	1	2	0	3	0	21	22	1	3	1	1	1	4	0	33	2	2	3	6	6	1	1	2	127	0	100	1000	200	0	1	0	0	0	0	1	0
直肠恶性肿瘤	1	68	1	2	23.53	4	2	1	1	4	0	0	29	0	3	1	2	0	28	28	0	4	1	0	2	4	2	45	2	1	1	11	6	0	0	2	100	0	20	600	0	0	1	0	1	1	1	0	0
直肠恶性肿瘤	1	77	1	2	23.24	1	1	0	0	2	0	1	19	1	0	0	3	0	15	16	1	2	0	0	3	5	0	26	3	1	1	8	6	1	0	2	236	0	80	2500	300	0	1	0	1	1	1	0	0
腰椎椎管狭窄	2	62	1	3	31.11	1	1	0	0	1	0	1	12	1	4	1	1	1	13	14	1	3	1	1	1	3	0	21	2	2	3	8	8	1	1	2	254	0	150	1500	200	0	1	0	1	0	0	1	0
腰椎管狭窄	2	69	1	3	28.1	4	2	0	0	1	0	0	26	0	3	1	2	0	12	12	1	4	1	1	1	3	0	25	2	2	3	12	12	1	1	2	143	NA	30	1000	100	0	1	0	1	0	0	1	0
直肠乙状结肠恶性肿瘤	1	85	2	2	20.66	1	3	1	1	3	0	0	24	1	3	1	1	1	22	23	1	3	1	1	1	6	3	23	3	1	1	8	6	0	0	2	200	0	50	1000	200	0	1	0	1	1	1	1	0
乙状结肠恶性肿瘤	2	69	1	3	25.97	2	2	0	0	2	1	0	19	1	0	0	3	0	20	21	1	2	0	0	3	5	1	33	2	1	1	8	6	1	0	2	145	0	50	1000	700	0	1	0	1	0	1	1	0
结肠恶性肿瘤	1	62	1	2	22.79	2	2	0	0	3	0	0	21	1	1	0	3	0	25	26	0	0	0	0	0	5	0	45	2	1	1	8	6	1	0	2	16	0	2	500	50	0	1	0	1	0	1	0	0
胃肿瘤	1	67	1	3	25.76	2	2	1	1	3	0	0	28	0	0	0	0	0	28	29	0	1	0	0	0	4	0	38	2	1	1	8	6	0	0	2	266	0	50	1500	100	0	1	1	1	0	1	1	0
直肠恶性肿瘤	2	69	1	3	27.77	2	1	0	0	2	1	1	20	1	0	0	3	0	21	22	1	1	0	0	3	8	0	28	3	1	1	8	8	1	0	2	217	0	50	1000	200	0	1	0	1	0	1	1	0
乙状结肠恶性肿瘤	2	72	2	3	25.95	1	3	0	0	3	0	1	15	1	2	0	3	0	11	12	1	2	0	0	3	5	3	35	2	1	1	10	6	1	0	2	120	0	20	1000	500	0	1	0	1	1	1	0	0
乙状结肠恶性肿瘤	2	74	2	3	25.11	1	1	0	0	2	0	1	18	1	2	0	3	0	20	21	1	2	0	0	3	5	0	23	3	1	1	12	12	1	0	2	135	0	30	1500	300	0	1	0	1	0	1	1	0
直肠恶性肿瘤	1	67	1	2	21.8	1	2	1	1	3	0	1	13	1	1	0	3	0	11	12	1	2	0	0	3	5	0	32	2	1	1	12	12	1	0	2	265	0	30	1100	100	0	1	0	1	1	1	0	0
直肠乙状结肠交界处肿瘤	1	63	1	2	21.78	1	2	0	0	2	0	1	26	0	2	0	0	0	23	24	1	3	1	1	1	5	2	33	2	1	1	12	12	1	0	2	200	0	20	1000	200	0	1	0	1	1	1	0	0
腰椎椎管狭窄	1	69	1	3	26.64	1	1	0	1	2	0	0	19	1	1	0	3	0	19	20	1	2	0	0	3	2	0	32	2	2	3	8	8	1	1	2	370	350.856	600	2000	450	0	1	0	0	0	0	1	0
原发性双侧膝关节病（左）	1	84	1	3	27.24	3	1	1	0	3	0	1	23	1	1	0	3	0	22	23	1	2	0	0	3	4	0	47	2	2	2	8	6	1	1	2	95	23.3774	15	500	509.261	0	1	0	0	0	0	1	0
回盲部恶性肿瘤	2	64	1	2	20.34	2	1	0	0	2	0	1	27	0	1	0	0	0	22	23	1	3	1	1	1	4	2	32	2	1	1	10	8	1	0	2	120	0	50	1000	100	0	1	0	1	0	1	1	0
腰椎管狭窄	2	65	1	3	25.1	2	2	0	0	1	0	0	19	1	4	1	1	1	17	18	1	4	1	1	1	5	0	28	3	2	3	10	10	1	1	2	204	0	100	1500	350	0	1	0	1	0	0	1	0
原发性双侧膝关节病（右）	2	72	1	2	24.03	1	1	0	0	3	0	1	24	1	2	0	3	0	20	21	1	3	1	1	1	3	0	23	2	2	2	8	6	1	1	2	94	0	30	1000	0	0	0	0	0	0	0	0	0
腰椎间盘突出	1	68	1	2	22.04	2	1	0	0	2	0	0	22	1	0	0	3	0	21	22	1	2	0	0	3	4	0	38	2	2	3	8	6	1	0	2	244	0	400	1000	0	0	1	0	1	0	0	1	0
原发性双侧膝关节病（右）	2	74	1	3	25.89	1	1	0	0	3	0	0	19	1	2	0	3	0	18	19	1	2	0	0	3	3	0	43	2	2	2	8	2	1	1	2	109	0	30	1000	173.104	0	0	0	0	0	0	0	0
直肠肿瘤	2	78	2	2	20.44	3	2	0	0	3	0	1	23	1	1	0	3	0	24	25	1	4	1	1	1	5	3	25	2	1	1	48	48	1	0	2	120	0	10	1000	100	0	1	0	1	1	1	0	0
髋的其他先天性变形（右）	2	60	1	3	25.3	1	1	0	0	2	0	0	26	0	0	0	0	0	22	23	1	2	0	0	3	2	0	45	2	2	2	10	4	1	1	2	104	90.1531	100	500	0	0	1	0	0	0	0	1	0
原发性双侧膝关节病（左）	2	73	1	3	25.1	2	1	0	0	2	0	0	17	1	2	0	3	0	NA	NA	1	3	1	1	1	3	0	33	2	2	2	6	2	1	1	2	180	42.8866	80	1000	168.453	0	1	0	0	0	0	1	0
腰椎管狭窄	1	77	2	3	26.27	2	2	0	0	1	0	0	28	0	4	1	2	0	25	26	0	3	1	0	2	5	0	22	3	2	3	10	10	0	1	2	269	NA	50	1500	150	0	1	0	1	0	0	1	0
胃肿物	2	75	1	3	27.47	1	2	0	0	3	1	1	21	1	4	1	1	1	22	23	1	4	1	1	1	8	3	26	3	1	1	12	6	0	0	2	205	0	50	1000	300	0	1	1	1	1	1	0	0
腰椎管狭窄	2	72	1	3	25	2	3	0	0	1	0	0	15	1	1	0	3	0	11	12	1	2	0	0	3	3	0	37	3	2	3	6	6	0	1	2	156	NA	400	1000	100	0	1	0	1	0	0	1	0
三踝骨折	2	64	1	2	22.59	3	1	0	0	2	0	0	27	0	2	0	0	0	24	25	1	3	1	1	1	2	0	38	2	2	2	8	4	1	1	2	225	60.1181	20	1500	27.2719	0	0	0	0	0	0	0	0
胃窦恶性肿瘤	1	66	1	2	18.91	2	3	1	1	3	0	1	25	1	3	1	1	1	22	23	1	3	1	1	1	4	2	42	2	1	1	10	6	1	0	2	140	0	30	1000	100	0	1	1	1	0	1	1	0
腰椎椎管狭窄	1	75	1	2	20.31	2	1	0	0	3	0	0	27	0	2	0	0	0	18	19	1	3	1	1	1	3	1	32	2	2	3	10	10	1	1	2	134	0.924163	50	1000	400	0	1	0	0	0	0	1	0
内部关节假体的机械性并发症（左）	2	70	1	3	28.4	1	1	0	0	2	0	1	15	1	3	1	1	1	12	13	1	3	1	1	1	3	0	35	2	2	2	7	3	1	1	2	217	0	400	1000	446.315	0	1	0	0	0	0	1	0
原发性单侧膝关节病（右）	2	65	1	3	28.13	1	1	0	0	1	0	0	9	1	1	0	3	0	7	8	1	4	1	1	1	2	0	29	2	2	3	10	8	1	0	2	135	38.6549	110.17	1158.64	251.093	0	1	0	1	0	0	1	0
腰锥锥管狭窄	1	69	1	2	23.62	2	2	1	0	2	0	0	16	1	0	0	3	0	17	18	1	2	0	0	3	2	0	40	2	2	3	8	6	0	0	2	181	0	100	1000	200	0	1	0	1	0	0	1	0
回盲部恶性肿瘤	2	72	2	3	24.89	1	1	0	0	2	0	1	12	1	1	0	3	0	8	9	1	3	1	1	1	6	0	34	3	1	1	8	6	1	0	2	221	0	50	2000	150	0	1	0	1	0	1	1	0
降结肠恶性肿瘤	1	62	1	2	22.05	1	3	1	0	3	0	1	18	1	2	0	3	0	15	16	1	3	1	1	1	4	2	30	3	1	1	8	6	1	0	2	157	0	50	2000	100	0	1	0	1	0	1	1	0
原发性双侧膝关节病（右）	2	67	1	3	26.95	1	1	0	0	2	0	0	21	1	2	0	3	0	21	22	1	2	0	0	3	2	0	35	2	2	2	8	4	1	1	2	110	148.653	50	1000	0	0	1	0	0	0	0	1	0
原发性单侧膝关节病（左）	2	68	1	3	24.61	1	3	0	0	2	0	0	26	0	2	0	0	0	25	26	0	3	1	0	2	2	0	30	2	2	2	8	4	1	1	2	84	9.01606	80	1000	273.454	0	1	0	0	0	0	1	0
原发性双侧膝关节病（左）	2	65	1	2	24.38	2	3	0	0	3	1	1	16	1	2	0	3	0	16	17	1	4	1	1	1	6	0	31	3	2	2	6	2	1	1	2	95	0	10	500	0	0	0	0	0	0	0	0	0
直肠恶性肿瘤	1	74	1	2	22.86	1	2	1	0	4	0	0	16	1	3	1	1	1	10	11	1	3	1	1	1	5	0	45	3	1	1	8	6	1	0	2	189	0	20	1000	300	0	1	0	1	0	1	1	0
原发性双侧膝关节病（右）	2	65	1	3	29.14	3	3	0	0	3	0	1	28	0	2	0	0	0	28	29	0	4	1	0	2	2	0	33	2	2	2	12	5	1	1	2	83	161.712	50	1100	709.855	0	1	0	0	0	0	1	0
直肠恶性肿瘤	2	71	1	1	15.82	1	2	0	0	2	0	1	15	1	3	1	1	1	16	17	1	3	1	1	1	5	3	27	2	1	1	8	6	1	0	2	196	0	50	1100	5	0	1	0	1	1	1	0	0
原发性双侧膝关节病（右）	2	62	1	2	23.88	3	2	0	0	3	0	0	26	1	1	0	3	0	23	24	1	3	1	1	1	2	0	33	2	2	2	8	4	1	1	2	115	0	100	500	379.467	0	1	0	1	0	0	1	0
结肠肿物	1	64	1	1	18.07	3	3	0	0	3	0	0	29	0	1	0	0	0	26	27	0	2	0	0	0	4	2	34	2	1	1	8	6	1	0	2	250	0	50	1000	200	0	1	0	1	1	1	0	0
原发性单侧膝关节病（左）	2	63	1	3	30.04	3	3	0	0	3	0	0	23	1	1	0	3	0	25	26	0	2	0	0	0	4	0	36	2	2	2	6	2	0	1	2	82	0	20	1000	52.4645	0	0	0	0	0	0	0	0
腰椎椎管狭窄	1	60	1	2	20.76	3	2	0	0	3	0	0	29	0	0	0	0	0	27	28	0	2	0	0	0	3	0	35	2	2	3	10	10	1	1	2	175	0	50	1000	350	0	1	0	0	0	0	1	0
直肠肿物	2	71	1	2	22.83	3	2	0	0	3	0	0	26	0	2	0	0	0	25	26	0	3	1	0	2	0	2	37	2	1	1	8	6	1	0	2	125	0	20	1000	150	0	1	0	1	0	1	1	0
胃窦恶性肿瘤	1	70	1	2	19.49	2	1	1	1	2	0	1	23	1	1	0	3	0	23	24	1	2	0	0	3	6	3	36	2	1	1	12	8	1	0	2	230	0	60	1000	300	0	1	1	1	1	1	0	0
原发性单侧膝关节病（左）	2	66	1	2	23.03	1	1	0	0	1	0	1	14	1	3	1	1	1	18	19	1	3	1	1	1	2	0	27	3	2	3	6	6	1	0	2	75	0	94.7666	58.693	311.346	0	1	0	1	0	0	1	0
腰椎椎管狭窄	2	63	2	3	26.75	2	2	0	0	2	0	0	22	1	1	0	3	0	21	22	1	2	0	0	3	2	0	21	3	2	3	8	8	1	1	2	253	8	150	1000	150	0	1	0	1	0	0	1	0
股骨远端骨折（右）	2	69	1	2	22.5	3	2	0	0	3	1	0	27	0	2	0	0	0	27	28	0	3	1	0	2	2	0	26	2	2	2	12	2	1	1	2	100	0	100	500	0	0	0	0	0	0	0	0	0
腰椎椎管狭窄	2	63	1	2	18.73	2	1	0	0	2	0	0	22	1	0	0	3	0	22	23	1	2	0	0	3	2	0	34	2	2	3	10	10	1	1	2	153	0	50	1000	100	0	1	0	1	0	0	1	0
腰椎管狭窄	1	72	1	2	23.19	4	1	0	0	2	0	0	22	1	4	1	1	1	22	22	1	4	1	1	1	5	0	27	3	2	3	8	8	1	1	2	315	NA	600	2000	400	0	1	0	1	0	1	1	0
腰椎椎管狭窄	1	62	1	3	31.25	1	1	0	0	2	0	0	20	1	2	0	3	0	13	14	1	3	1	1	1	3	0	33	2	2	3	6	6	1	1	2	295	310.53	400	2500	500	0	1	0	0	0	0	1	0
骨坏死，其他的	2	64	1	2	23.5	2	1	0	0	2	0	1	15	1	1	0	3	0	15	16	1	3	1	1	1	2	0	33	2	2	2	8	6	1	1	2	89	0	30	500	755.105	0	0	0	0	0	0	0	0
肝占位病变	2	63	1	3	29.78	1	1	0	1	3	0	0	15	1	0	0	3	0	16	17	1	2	0	0	3	2	0	32	2	1	1	8	6	1	0	2	120	0	100	500	0	0	1	0	1	0	1	1	0
原发性双侧膝关节病（右）	2	69	1	3	33.2	1	1	0	0	2	0	0	12	1	1	0	3	0	8	9	1	3	1	1	1	2	0	31	3	2	3	10	10	0	1	2	232	0	50	1500	100	0	1	0	1	0	0	1	0
降结肠乙状结肠恶性肿瘤	1	67	1	3	25.65	3	1	0	0	3	0	0	27	0	0	0	0	0	24	25	1	2	0	0	3	6	0	35	2	1	1	10	6	1	0	2	150	0	20	1000	250	0	1	0	1	0	1	1	0
升结肠恶性肿瘤	1	71	1	2	22.5	4	3	1	0	4	0	1	26	0	1	0	0	0	26	26	0	2	0	0	0	6	3	40	3	1	1	10	8	1	0	2	110	0	20	1500	100	0	1	0	1	1	1	0	0
[truncated: 40 more columns]

## Sheet: Assignment of value
Characteristics of study participants
Variable	Meaning	Assignment of value
sex	male	1
	female	2
Marital status	Marriage	1
	Divorced or widowed	2
Education	Below Primary	1
	Meddle	2
	High	3
	University	4
Pre-retirement occupation	Physical strength	1
	Both mental and physical strength	2
	Mental strength	3
Smoking status	No	0
	Yes	1
Alcohol status	No	0
	Yes	1
Multiple medication	No	0
	Yes	1
History of stress(within 1 year)	No	0
	Yes	1
ASA score	Level 2	1
	Level 3	2
Surgery category	Abdomen	1
	Limbs	2
	Spine	3
Use analgesia pump	No	0
	Yes	1
Preemptive analgesis	No	0
	Yes	1
post adverse outcomes
postoperative complication (CD≥II)	No	0
	Yes	1
Post infection	No	0
	Yes	1
Hypoalbuminemia	No	0
	Yes	1
Electrolyte disturbances	No	0
	Yes	1
Mobility disability	No	0
	Yes	1
Prolonged hospital stay	No	0
	Yes	1
Reoperation	No	0
	Yes	1
90-day readmission	No	0
	Yes	1
